# Supplementary material
Source: Springer Nature journal article supplement (https://www.springermedizin.de/resource/supplementary/12913_2007_455_MOESM2_ESM.pdf/9534784)

Street

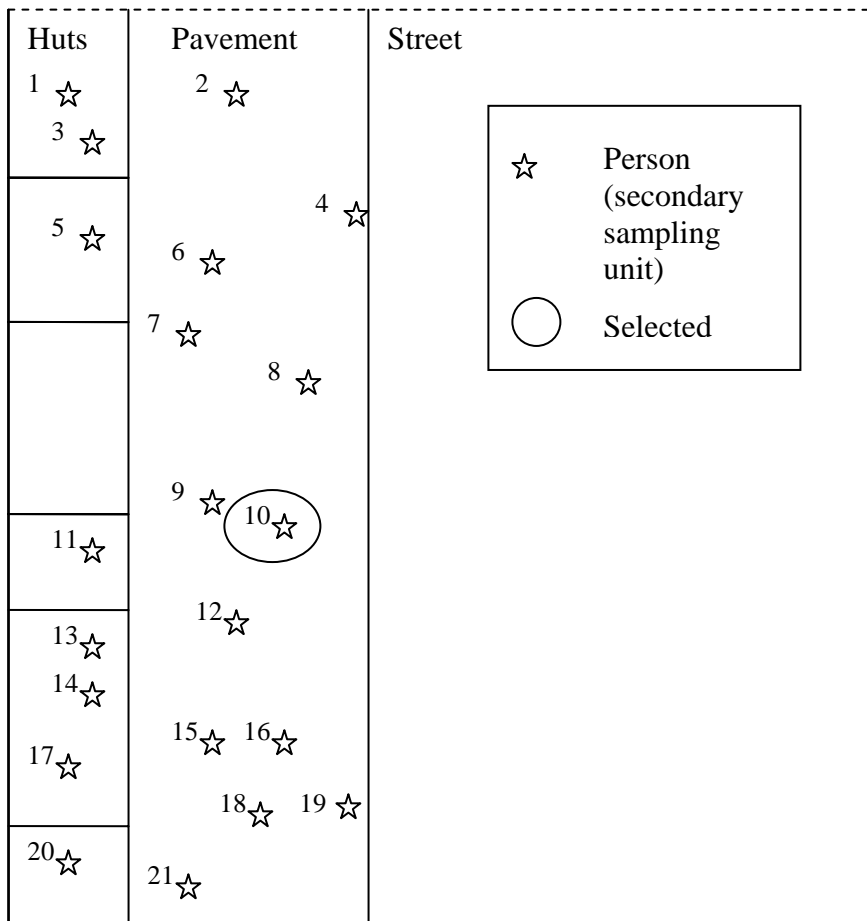

Street

Supplement: MOESM2 [file 9534784]
